# Supplementary material for: Ribosome assembly defects subvert initiation Factor3 mediated scrutiny of bona fide start signal
Source: PubMed Central journal article supplement — Nucleic Acids Res. 2019 Oct 5;47(21):11368–86. doi: 10.1093/nar/gkz825 (PMC6868393; doi:10.1093/nar/gkz825), 2019-10-05
Supplement: gkz825_supplemental_file.pdf [file gkz825_supplemental_file.pdf]

## **Supplemental Information**

### **Ribosome Assembly Defects Subvert Initiation Factor3 Mediated Scrutiny of Bona Fide Start Signal**

**Himanshu Sharma and B. Anand\***

**Department of Biosciences and Bioengineering, Indian Institute of Technology  
Guwahati, Guwahati 781039, Assam, INDIA**

**\*Corresponding Author**

**Email: [banand@iitg.ac.in](mailto:banand@iitg.ac.in)**

**Phone: +91-361-2582223**

**Fax: +91-361-2582249**

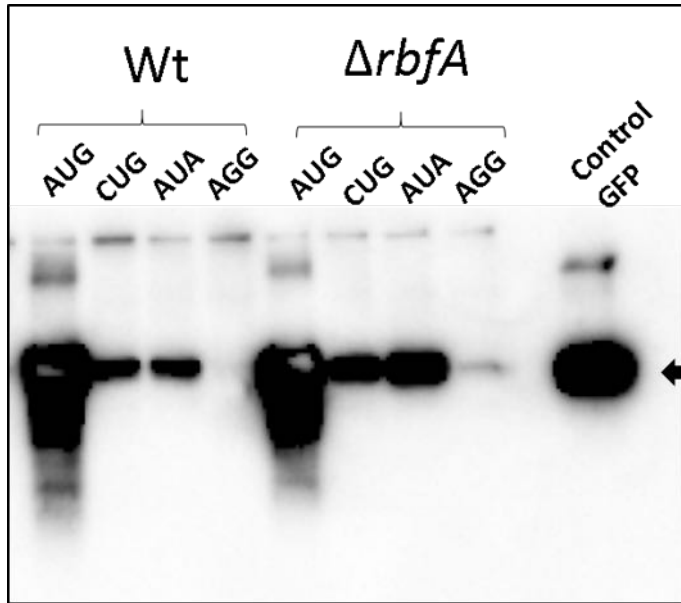

**Figure S1: Assembly defects compromise the recognition of the start codon during translation initiation**

Level of GFP production conferred by various start codons in *Wt* and *ΔrbfA*, measured by immunoblotting using an anti-GFP antibody is presented. The respective start codons are indicated on top of each lane and purified GFP is loaded in the control GFP lane. Bands corresponding to GFP are indicated with an arrow on the right. Cell lysates corresponding to a total of 30 μg protein was loaded in each lane after normalization.

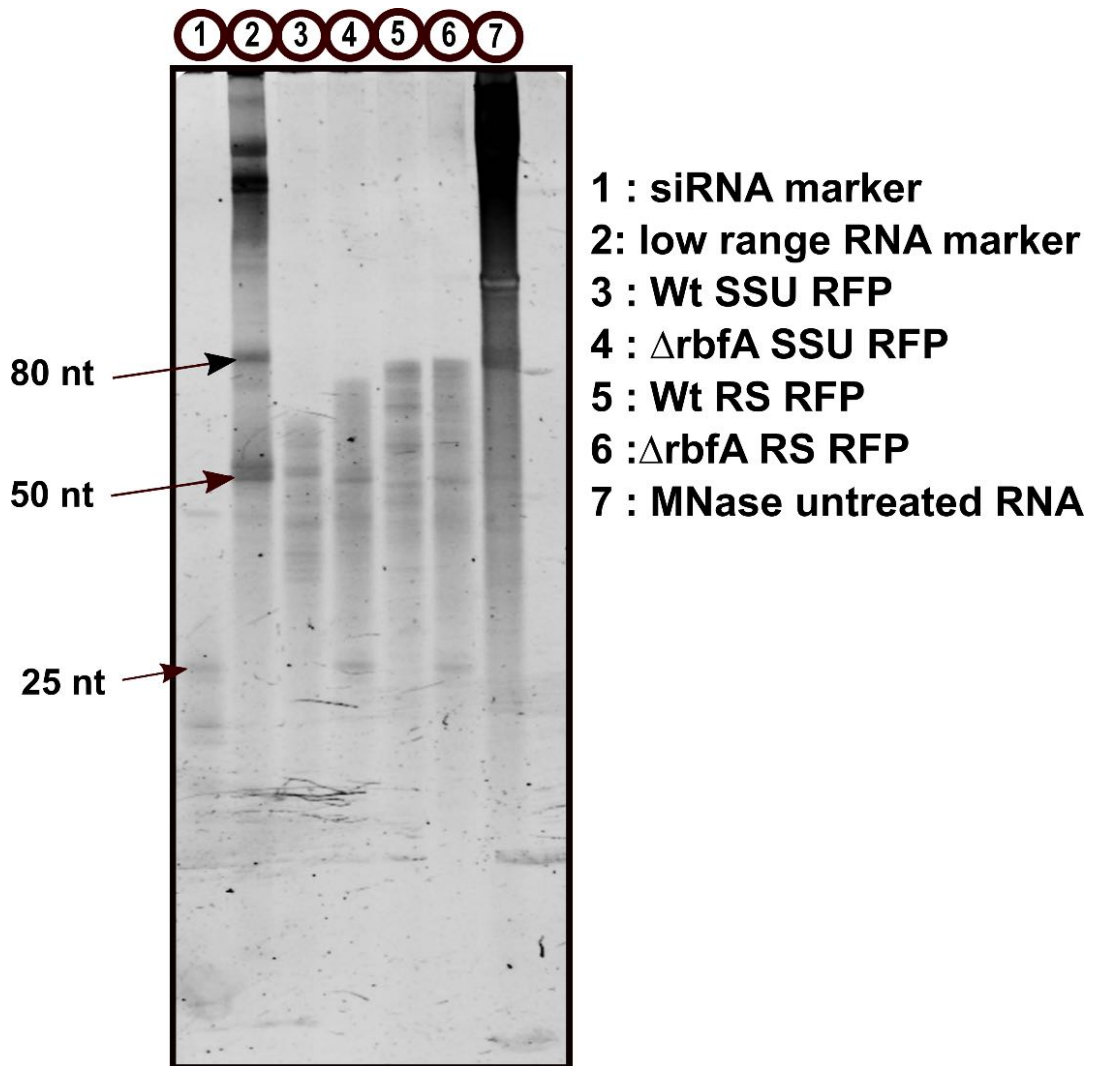

**Figure S2: Purification of FPs from 30S and 70S fractions**

Ribosome footprints purified from 30S and 70S fractions of WT and  $\Delta$ rbfA. RNA size standards (siRNA Markers and low range marker) are loaded for comparison. RNA isolated from Wt 70S fraction not treated with MNase is also loaded for comparison in the last lane.

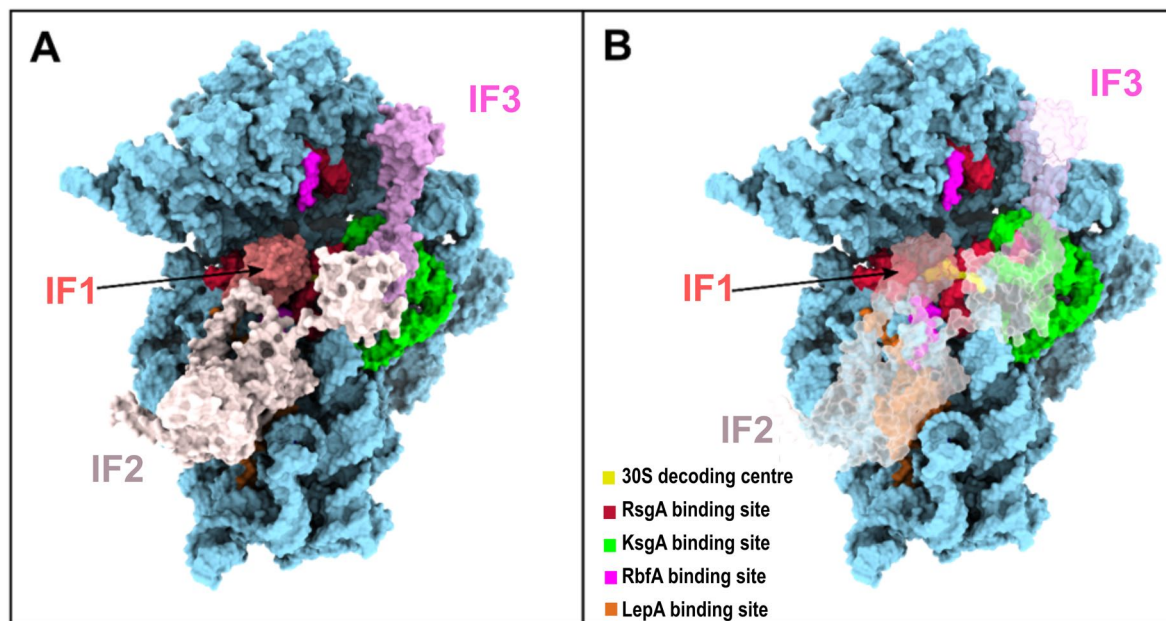

**Figure S3: Assembly factors and Initiation factors bind to overlapping regions on the 30S subunit**

- (A)** A surface representation of the 30S subunits (shown in sky blue) bound to the three initiation factors IF1(Coral red), IF2 (Beige) and IF3 (Rose Pink) as observed by Cryo-EM studies is presented (PDB ID: 5LMV) (1).
- (B)** The 30S subunit bound to initiation factors (PDB ID: 5LMV) is marked for the sites of late stage assembly factors and the 30S decoding center. The initiation factors are shown in a transparent surface representation and the colour coding for assembly factor binding sites are also indicated.

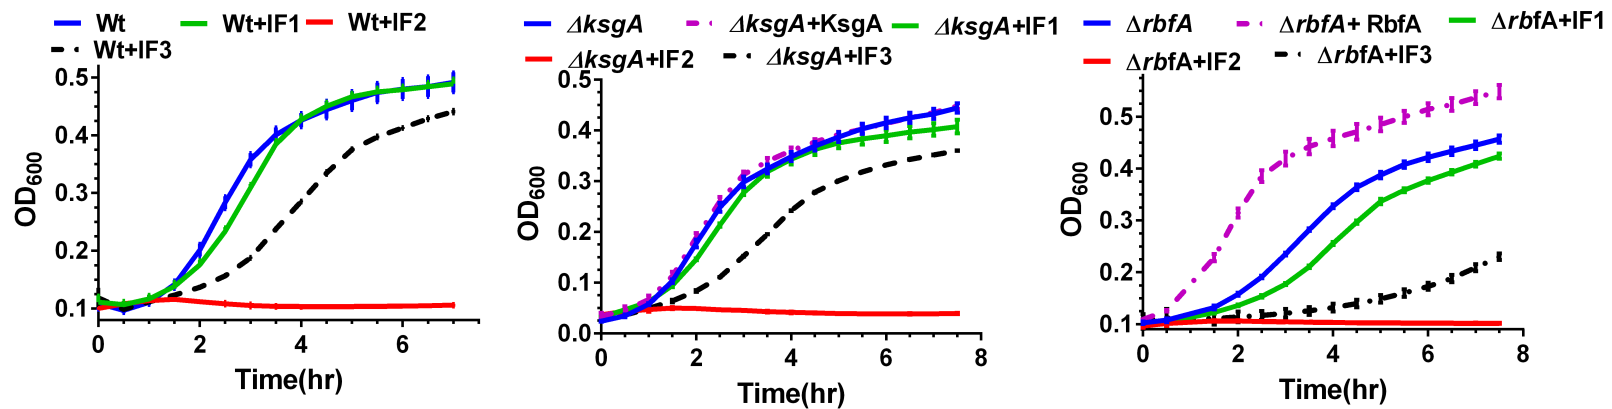

**Figure S4: Overproduction of IFs does not provide a growth advantage**

Growth comparison for Wt (A),  $\Delta rbfA$  (B) and  $\Delta ksgA$  (C) transformed with a vector carrying genes encoding IF1, IF2, IF3, RbfA and KsgA. Protein production from the respective plasmids was induced at time = 0.



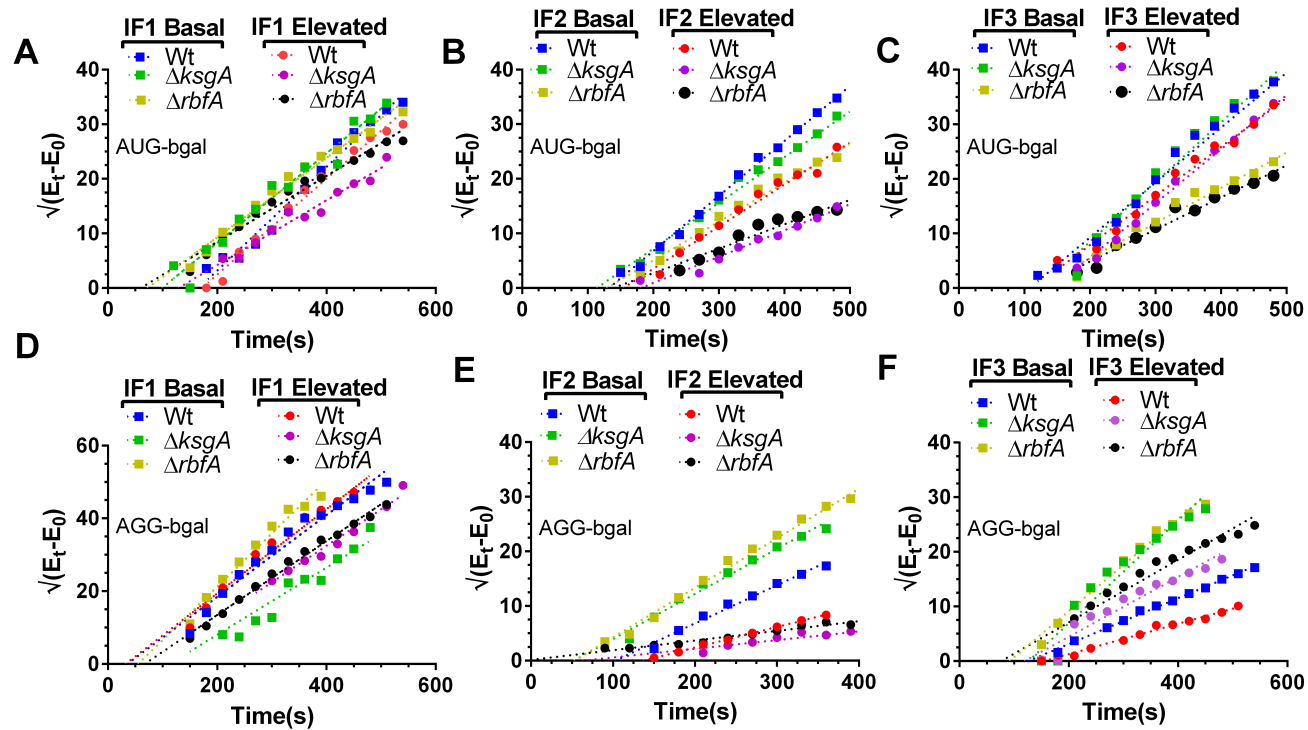

**Figure S6: Elevated concentrations of Initiation factors prohibit translation initiation by premature ribosomes**

Schleich plots for bgal translation kinetics from an AUG-bgal or AGG-bgal mRNA, measured in Wt,  $\Delta rbfA$  and  $\Delta ksgA$  with basal or elevated cellular concentrations of IF1 (A, D), IF2 (B, E) and IF3 (C, F), respectively. Translation kinetics measurements were taken after elevating the cellular concentration of the respective IFs (*vide Methods*). The rise in bgal production over time was fitted to a linear regression model to derive the slope of each plot and this slope indicated the respective translation initiation rate (IR). The plots were drawn from the averaged measurement from three independent time course experiments. A ratio of the translation initiation rates derived from these plots are presented in Figure 7.

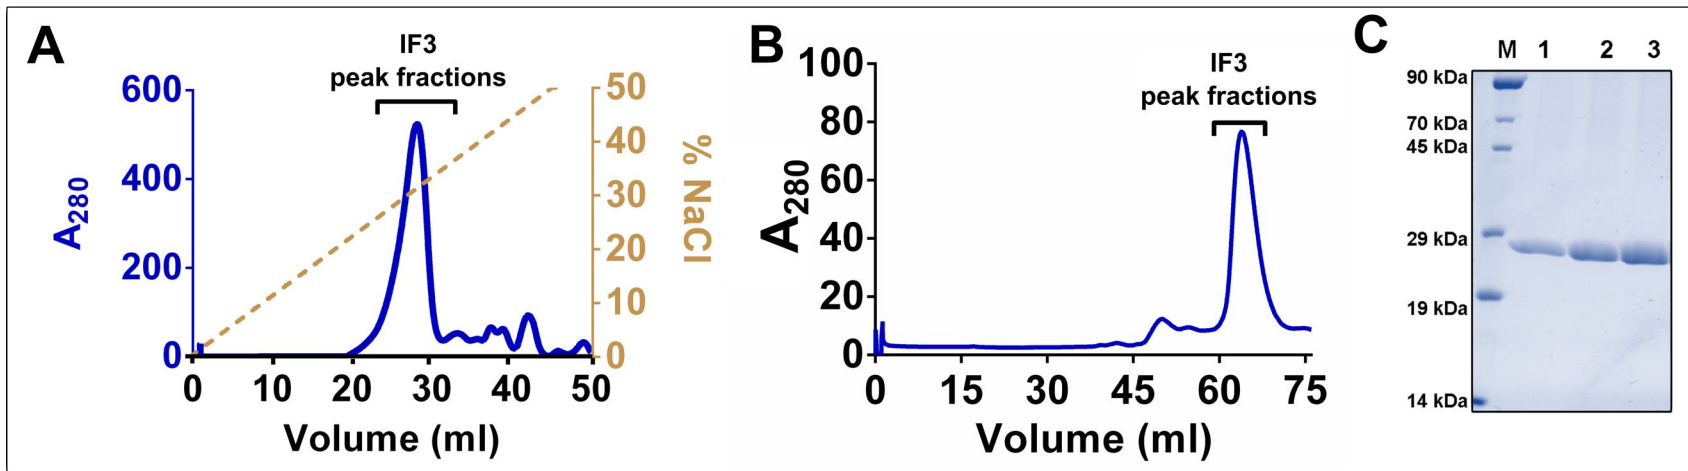

**Figure S7: Purification of IF3**

- (A) A chromatogram depicting the purification of Initiation factor3 using ion exchange chromatography. The elution was performed using a linear NaCl gradient (*vide* Methods). The indicated peak fractions were pooled and further polished using gel filtration chromatography.
- (B) A chromatogram representing size exclusion chromatography for pooled peak fractions of IF3 (from **A**). The indicated fractions were checked for homogeneity and used for binding with ribosomes.
- (C) An SDS-PAGE analysis to check the purity of IF3 is presented. Purified fractions are indicated above the gel and protein size standard is loaded in the lane indicated as "M". Molecular weights of the respective bands are indicated on the left.



**Table S1. List of strains and plasmids used in this study**

| Strain/ Plasmids                                            | Description                                                                                                                                                                                                                                                                     | Source                                |
|-------------------------------------------------------------|---------------------------------------------------------------------------------------------------------------------------------------------------------------------------------------------------------------------------------------------------------------------------------|---------------------------------------|
| BW25113 (Wt) (CGSC #7636)                                   | <i>F</i> <sup>-</sup> , $\Delta$ ( <i>araD-araB</i> )567, $\Delta$ <i>lacZ</i> 4787(:: <i>rrnB</i> -3), $\lambda$ <sup>-</sup> , <i>rph</i> -1, $\Delta$ ( <i>rhaD-rhaB</i> )568, <i>hsdR</i> 514                                                                               | Coli genetic stock centre (CGSC)      |
| $\Delta$ <i>rsgA</i>                                        | <i>F</i> <sup>-</sup> , $\Delta$ ( <i>araD-araB</i> )567, $\Delta$ <i>lacZ</i> 4787(:: <i>rrnB</i> -3), $\lambda$ <sup>-</sup> , <i>rph</i> -1, $\Delta$ ( <i>rhaD-rhaB</i> )568, $\Delta$ <i>rsgA</i> :: <i>kan</i> , <i>hsdR</i> 514                                          | This paper                            |
| $\Delta$ <i>rbfA</i>                                        | <i>F</i> <sup>-</sup> , $\Delta$ ( <i>araD-araB</i> )567, $\Delta$ <i>lacZ</i> 4787(:: <i>rrnB</i> -3), $\lambda$ <sup>-</sup> , <i>rph</i> -1, $\Delta$ ( <i>rhaD-rhaB</i> )568, $\Delta$ <i>rbfA</i> :: <i>kan</i> , <i>hsdR</i> 514                                          | This paper                            |
| $\Delta$ <i>ksgA</i>                                        | <i>F</i> <sup>-</sup> , $\Delta$ ( <i>araD-araB</i> )567, $\Delta$ <i>lacZ</i> 4787(:: <i>rrnB</i> -3), $\lambda$ <sup>-</sup> , <i>rph</i> -1, $\Delta$ ( <i>rhaD-rhaB</i> )568, $\Delta$ <i>ksgA</i> :: <i>kan</i> , <i>hsdR</i> 515                                          | This paper                            |
| $\Delta$ <i>lepA</i>                                        | <i>F</i> <sup>-</sup> , $\Delta$ ( <i>araD-araB</i> )567, $\Delta$ <i>lacZ</i> 4787(:: <i>rrnB</i> -3), $\lambda$ <sup>-</sup> , <i>rph</i> -1, $\Delta$ ( <i>rhaD-rhaB</i> )568, $\Delta$ <i>lepA</i> :: <i>kan</i> , <i>hsdR</i> 516                                          | This paper                            |
| TOP10                                                       | <i>F</i> <sup>-</sup> <i>mcrA</i> $\Delta$ ( <i>mrr-hsdRMS-mcrBC</i> ) $\phi$ 80 <i>lacZ</i> $\Delta$ M15 $\Delta$ <i>lacX</i> 74 <i>recA</i> 1 <i>araD</i> 139 $\Delta$ ( <i>araleu</i> )7697 <i>galU</i> , <i>galK</i> , <i>rpsL</i> <i>endA</i> 1, <i>nupG</i> , <i>StrR</i> | Invitrogen                            |
| B wild type (CGSC # 5365)                                   | <i>lon</i> <sup>-</sup> , <i>malB</i> <sup>-</sup> , <i>dcm</i> <sup>-</sup>                                                                                                                                                                                                    | Coli genetic stock centre             |
| TKC                                                         | <i>E. coli</i> W3110 derivative, used for amplifying antibiotic selection markers                                                                                                                                                                                               | A kind gift from Donald. L. Court     |
| pKD46 (CGSC#7739)                                           | <i>ori</i> R101, <i>repA</i> 101ts, <i>AmpR</i> , <i>araC</i> , expresses $\lambda$ Red genes ( <i>gam</i> - <i>bet</i> - <i>exo</i> ) under the control of arabinose inducible promoter (pBAD).                                                                                | Coli genetic stock centre (CGSC)      |
| pET His6 GFP TEV LIC vector (1GFP) (Addgene plasmid #29663) | <i>ori</i> pMB1, <i>KanR</i> , <i>lacI</i> , expresses an enhanced version of <i>gfp</i> under the control of an IPTG inducible promoter (PT7 <i>lac</i> ).                                                                                                                     | Scott Gradia , Addgene plasmid #29663 |
| pBAD Strep TEV LIC vector (8R) (Addgene plasmid # 37506)    | <i>ori</i> pBR322, <i>AmpR</i> , <i>araC</i> , <i>araO</i> 2O1, N terminal strep tag fused to protein of interest expressed under control of pBAD promoter                                                                                                                      | Scott Gradia , Addgene plasmid        |
| pAUG-GFP-8R                                                 | <i>ori</i> pBR322, <i>AmpR</i> , <i>araC</i> , <i>araO</i> 2O1, <i>gfp</i> with AUG start codon expressed under control of pBAD promoter                                                                                                                                        | This paper                            |
| pCUG-GFP-8R                                                 | <i>ori</i> pBR322, <i>AmpR</i> , <i>araC</i> , <i>araO</i> 2O1, <i>gfp</i> with CUG start codon expressed under control of pBAD promoter                                                                                                                                        | This paper                            |
| pAUA-GFP-8R                                                 | <i>ori</i> pBR322, <i>AmpR</i> , <i>araC</i> , <i>araO</i> 2O1, <i>gfp</i> with AUA start codon expressed under control of pBAD promoter                                                                                                                                        | This paper                            |

|                |                                                                                                                                                                       |                                           |
|----------------|-----------------------------------------------------------------------------------------------------------------------------------------------------------------------|-------------------------------------------|
| pAGG-GFP-8R    | ori pBR322,AmpR ,araC, araO2O1, <i>gfp</i> with AGG start codon expressed under control of pBAD promoter                                                              | This paper                                |
| pPlus1-GFP-8R  | ori pBR322,AmpR ,araC, araO2O1, <i>gfp</i> with AUG start codon and a +1 frameshift at 7 <sup>th</sup> codon, expressed under control of pBAD promoter                | This paper                                |
| pMinus1-GFP-8R | ori pBR322,AmpR ,araC, araO2O1, <i>gfp</i> with AUG start codon and a -1 frameshift at 7 <sup>th</sup> codon, expressed under control of pBAD promoter                | This paper                                |
| pUAA7-GFP-8R   | ori pBR322,AmpR ,araC, araO2O1, <i>gfp</i> with AUG start codon and a premature UAA stop codon at the 7 <sup>th</sup> codon, expressed under control of pBAD promoter | This paper                                |
| pUAG8-GFP-8R   | ori pBR322,AmpR ,araC, araO2O1, <i>gfp</i> with AUG start codon and a premature UAG stop codon at the 8 <sup>th</sup> codon, expressed under control of pBAD promoter | This paper                                |
| pQE2           | ori ColE1, AmpR, expresses gene of interest to synthesize N-terminal 6xHis tagged protein under the IPTG inducible T5 promoter.                                       | Qiagen                                    |
| pAUG-bgal      | pQE2 carrying a <i>lacZ</i> gene with a AUG start codon under the IPTG inducible T5 promoter.                                                                         | This paper                                |
| pAGG-bgal      | pQE2 carrying a <i>lacZ</i> gene with a AGG start codon under the IPTG inducible T5 promoter.                                                                         | This paper                                |
| pRsgA-15A      | ori p15A, CamR, tetR, <i>rsgA</i> under the control anhydrotetracycline inducible promoter (PLtetO-1).                                                                | This paper                                |
| pRbfA-15A      | ori p15A, CamR, tetR, <i>rbfA</i> under the control anhydrotetracycline inducible promoter (PLtetO-1).                                                                | This paper                                |
| pKsgA-15A      | ori p15A, CamR, tetR, <i>ksgA</i> under the control anhydrotetracycline inducible promoter (PLtetO-1).                                                                | This paper                                |
| pLepA-15A      | ori p15A, CamR, tetR, <i>lepA</i> under the control anhydrotetracycline inducible promoter (PLtetO-1).                                                                | This paper                                |
| pIF-1-15A      | ori p15A, CamR, tetR, <i>infA</i> under the control anhydrotetracycline inducible promoter (PLtetO-1).                                                                | This paper                                |
| pIF-2-15A      | ori p15A, CamR, tetR, <i>infB</i> under the control anhydrotetracycline inducible promoter (PLtetO-1).                                                                | This paper                                |
| pIF-3-15A      | ori p15A, CamR, tetR, <i>infC</i> under the control anhydrotetracycline inducible promoter (PLtetO-1).                                                                | This paper                                |
| pMetZ          | pQE2 carrying the <i>metZ</i> gene under an <i>lpp</i> promoter.                                                                                                      | This paper                                |
| p1R            | T7-lac inducible, ColE1 origin plasmid for expressing genes with N-terminally fused Strep-II tag.                                                                     | Scott Gradia<br>Addgene plasmid<br>#29664 |
| p1R-IF3        | T7-lac inducible, ColE1 origin plasmid for expressing <i>infC</i> with N-terminally fused Strep-II tag.                                                               | Scott Gradia<br>Addgene plasmid<br>#29664 |

**Table S2. List of oligonucleotides used in this study**

| <b>Oligo name</b> | <b>Sequence (5' to 3')</b>                                                       | <b>Description</b>                                                      |
|-------------------|----------------------------------------------------------------------------------|-------------------------------------------------------------------------|
| C1FP_GFP_8R       | TTTTTTGGGCTAACATCTAGAAATAATTTTGTTTAACTTTAAGAAGGAGATATACATATG<br>GGTTCTTCTCACCATC | Amplifying <i>gfp</i> with an AUG start codon for cloning in 8R         |
| URP_GFP_8R        | CAAAACAGCCAAGGGATCCTTATCCACTTCCAATATTG                                           | Amplifying <i>gfp</i> for cloning in 8R                                 |
| C2FP_GFP_8R       | TTTTTTGGGCTAACATCTAGAAATAATTTTGTTTAACTTTAAGAAGGAGATATACATCT<br>GGTTCTTCTCACCATC  | amplifying <i>gfp</i> with an CUG start codon for cloning in 8R         |
| C3FP_GFP_8R       | TTTTTTGGGCTAACATCTAGAAATAATTTTGTTTAACTTTAAGAAGGAGATATACATAT<br>AGTTCTTCTCACCATC  | Amplifying <i>gfp</i> with an AUA start codon for cloning in 8R         |
| C4FP_GFP_8R       | TTTTTTGGGCTAACATCTAGAAATAATTTTGTTTAACTTTAAGAAGGAGATATACATAGG<br>GGTTCTTCTCACCATC | Amplifying <i>gfp</i> with an AGG start codon for cloning in 8R         |
| C5FP_GFP_2        | ATGGGTTCTTCTCACCATCATTAAACACCATGGTTCTTCTGTGAGCA                                  | Amplifying <i>gfp</i> with a premature UAA stop codon for cloning in 8R |
| C6FP_GFP_2        | ATGGGTTCTTCTCACCATCATTAGCACCATGGTTCTTCTGTGAG                                     | Amplifying <i>gfp</i> with a premature UAG stop codon for cloning in 8R |

|                  |                                                                          |                                                                       |
|------------------|--------------------------------------------------------------------------|-----------------------------------------------------------------------|
| C7FP_GFP_2       | ATGGGTTCTTCTCACCATCACGGATAAGGATCCCCGGGAATTCACATCACCATGGTTC<br>TTCT       | Amplifying <i>gfp</i> with a -1 frameshift mutation and cloning in 8R |
| C8FP_GFP_2       | ATGGGTTCTTCTCACCATCACGTGTAGGGTTAGCGGCCCTAATTCACATCACCATGGT<br>TCTTCT     | Amplifying <i>gfp</i> with a +1 frameshift mutation and cloning in 8R |
| BGAL_PQE2_F<br>P | ATCACCATCACCATCACCATATGATGACCATGATTACGGATTAC                             | Amplifying <i>lacZ</i> with an AUG start codon for cloning in pQE2    |
| BGAL_PQE2_R<br>P | TCCAAGCTCAGCTAATTAAGCTTTTATTTTTGACACCAGACCAAC                            | Amplifying <i>lacZ</i> for cloning in pQE2                            |
| BGAL_AGG FP      | GCGGATAACAATTTACACAGAATTCATTAAGAGGAGAAATTAAGTAGGACCATGATT<br>ACGGATTCACT | Amplifying <i>lacZ</i> with an AGG start codon for cloning in pQE2    |
| INFA_P15A_FP     | GATAGAGAAAAGAATTCAAAAGATCTAAAGAGGAGAAAGGATCTATGGCCAAAGAAGA<br>CAATATTG   | Cloning <i>infA</i> into p15A vector backbone                         |
| INFA_P15A_RP     | TGCCTGGAGATCCTTACTCGAGTCAGCGACTACGGAAGAC                                 |                                                                       |

|                  |                                                                          |                                                  |
|------------------|--------------------------------------------------------------------------|--------------------------------------------------|
| INFB_P15A_FP     | GATAGAGAAAAGAATTCAAAGATCTAAAGAGGAGAAAGGATCT<br>ATGACAGATGTAACGATTAACG    | Cloning <i>infb</i> into p15A<br>vector backbone |
| INFB_P15A_RP     | TGCCTGGAGATCCTTACTCGAGTTAAGCAATGGTACGTTGGAT                              |                                                  |
| INFC_P15A_FP     | GATAGAGAAAAGAATTCAAAGATCTAAAGAGGAGAAAGGATCT<br>ATGAAAGGCGGAAAACGAGTTC    | Cloning <i>infc</i> into p15A<br>vector backbone |
| INFC_P15A_RP     | TGCCTGGAGATCCTTACTCGAGTTACTGTTTCTTCTTAGGAGCG                             |                                                  |
| RSGA_P15A_F<br>P | GTGATAGAGAAAAGAATTCAAAGATCTAAAGAGGAGAAAGGATCTTTGAGTAAAAT<br>AAACTCTCAAAG | Cloning <i>rsgA</i> into p15A<br>vector backbone |
| RSGA_P15A_R<br>P | GGAGATCCTTACTCGAGTCAGTCATCCGTATCAGAAAAG                                  |                                                  |
| RBFA_P15A_F<br>P | GTGATAGAGAAAAGAATTCAAAGATCTAAAGAGGAGAAAGGATCTATGGCGAAAGAA<br>TTTGGTCCG   | Cloning <i>rbfA</i> into p15A<br>vector backbone |
| RBFA_P15A_R<br>P | GGAGATCCTTACTCGAGTTAGTCCTCCTTGCTGTCGTCC                                  |                                                  |

|              |                                                                              |                                                  |
|--------------|------------------------------------------------------------------------------|--------------------------------------------------|
| KSGA_P15A_FP | GTGATAGAGAAAAGAATTCAAAGATCTAAAGAGGAGAAAAGGATCTATGAATAATCGA<br>GTCCACCAGGG    | Cloning <i>ksgA</i> into p15A<br>vector backbone |
| KSGA_P15A_RP | GGAGATCCTTACTCGAGTTAACTCTCCTGCAAAGGCG                                        |                                                  |
| LEPA_P15A_FP | GTGATAGAGAAAAGAATTCAAAGATCTAAAGAGGAGAAAAGGATCTATGAAGAATATA<br>CGTAACTTTTCGAT | Cloning <i>lepA</i> into p15A<br>vector backbone |
| LEPA_P15A_RP | TGCCTGGAGATCCTTACTCGAGTTATTTGTTGTCTTTGCCGACGTG                               |                                                  |
| DELKSGA_FP   | AATACACACTCGGGGCGAATTGATCATCGTTAACTCTCCTGCAAAGGCGCTTTAAGAA<br>GGAGATATAGTTC  | Used for creating knock-<br>outs of <i>ksgA</i>  |
| DELKSGA_RP   | CATTGGGTGTTAACAATCATTTTGATGGCGAGATTAAGCGCCGTAATAAAGGATTGGA<br>AGTAGAGGTTCTC  |                                                  |
| DEL_RBFA_FP  | GTCGCGACCGCGACGACGAGGACGACTCATTAGTCCTCCTTGCTGTCGTCTTTAAGA<br>AGGAGATATAGTTC  | Used for creating knock-<br>outs of <i>rbfA</i>  |

|                      |                                                                                     |                                                                            |
|----------------------|-------------------------------------------------------------------------------------|----------------------------------------------------------------------------|
| DEL_RBFA_RP          | CATAATAAATTCTCCTGACAAAAAAGGGGCTGTTAGCCCCTTTTTAAAATGGATTGGAA<br>GTAGAGGTTCTC         |                                                                            |
| DEL_RSGA_FP          | GACGATTCTAACGACGGTTAGCTTAATTGTCAGTCATCCGTATCAGAAAA<br>CAAGAGGGTCATTATATTTTCG        | Used for creating knock-<br>outs of <i>rsgA</i>                            |
| DEL_RSGA_RP          | GTATCATAGATGTTTTGCCCATCAGGGGCGACCAGGAGTCTGTACGATTG<br>TCCTAATTTTTGTTGACACTCTA       |                                                                            |
| DEL_LEPA_FP          | ACTTCTAAAAGCCTGGTTAACCGGGCATTAAAGGCACAATAATCATACTTTTTTAAGAAG<br>GAGATATAGTTC        | Used for creating knock-<br>outs of <i>lepA</i>                            |
| DEL_LEPA_RP          | GCAGCTCGACGTTACCGATCTGCTTCATGCGTTTCTTACCTTCTTTCTGCTTCTGCAG<br>GGATTGGAAGTAGAGGTTCTC |                                                                            |
| KSGA_200FLA<br>NK FP | TCCTTCGCCCTGGACTTC                                                                  | Gene flanking primers used<br>for screening of <i>ksgA</i> null<br>mutants |
| KSGA_200FLA<br>NK RP | GCGATGTACCACGATCAGG                                                                 |                                                                            |
| RBFA_200FLA<br>NK FP | CTGGGAAAACCTTCGTCGCTT                                                               | Gene flanking primers used<br>for screening of <i>rbfA</i> null<br>mutants |
| RBFA_200FLA<br>NK RP | ATTCGAAATCATCGAGATCCAACG                                                            |                                                                            |
| RSGA_200FLA<br>NK FP | TCC ACA ATT GCG TGT ATCA                                                            | Gene flanking primers used<br>for screening of <i>rsgA</i> null<br>mutants |
| RSGA_200FLA<br>NK RP | CCTACATGCCGGATCCTG                                                                  |                                                                            |
| LEPA_200FLAN<br>K_FP | TGATTTCACTGGCTTTGTTGC                                                               |                                                                            |

|                      |                    |                                                                            |
|----------------------|--------------------|----------------------------------------------------------------------------|
| LEPA_200FLAN<br>K_RP | TCCAGCCAGCCAGGCTTC | Gene flanking primers used<br>for screening of <i>lepA</i> null<br>mutants |
|----------------------|--------------------|----------------------------------------------------------------------------|

## References

1. Hussain, T., Llácer, J.L., Wimberly, B.T., Kieft, J.S. and Ramakrishnan, V. (2016) Large-Scale Movements of IF3 and tRNA during Bacterial Translation Initiation. *Cell*, **167**, 133-144.e113.
